# Supplementary material for: Moxifloxacin Monotherapy in Left-Sided Staphylococcus aureus Endocarditis
Source: Case Rep Infect Dis. 2021 Apr 14;2021:5586450. doi: 10.1155/2021/5586450 (PMC8060113; doi:10.1155/2021/5586450)
Supplement: Supplementary Materials — Video: mobile vegetation attached to the atrial aspect of the posterior leaflet of the mitral valve is seen on the parasternal long axis view of TTE. [file 5586450.f1.txt]

https://drive.google.com/file/d/1vRdCHyjdOY7_8Qk0hAi_ExOLES5X8DnD/view?usp=sharing
